# Supplementary material
Source: Springer Nature journal article supplement (https://www.springermedizin.de/resource/supplementary/12947_2006_136_MOESM3_ESM.pdf/9556402)

**A**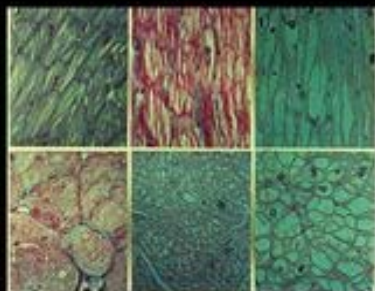**B**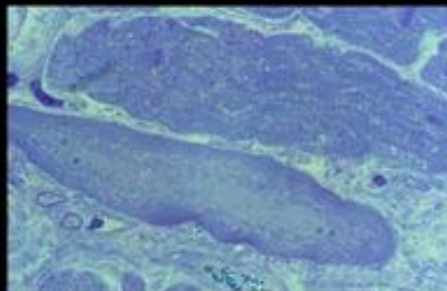**C**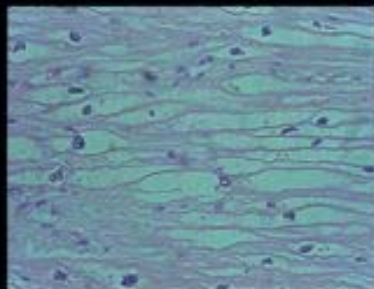**D**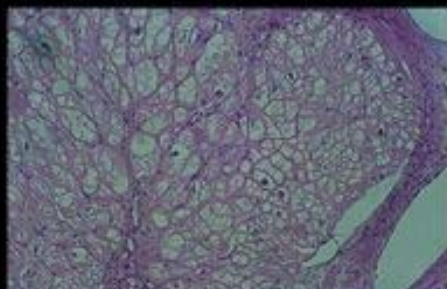**E**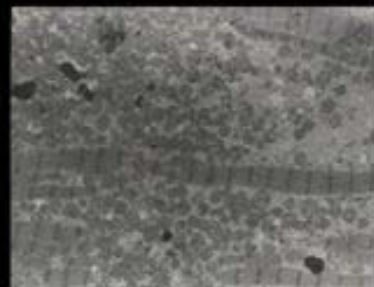**F**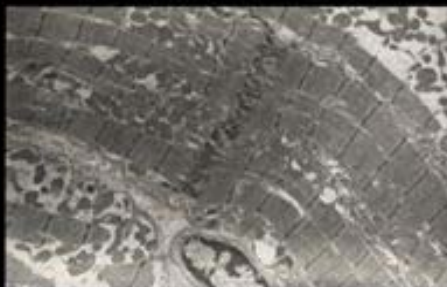

Supplement: MOESM3 [file 9556402]
